# Supplementary material for: Lymph node fibroblastic reticular cells deposit fibrosis-associated collagen following organ transplantation
Source: JCI journal article supplement (doi:10.1172/jci136618), 2020-06-28
Supplement: sd1 [file 1]

**Supplementary Table 1: Sequences of primers used for Real-time PCR.**

|               |                                         |
|---------------|-----------------------------------------|
| <i>Mcpt2</i>  | Forward 5'-ATTTCATTGCCTAGTTCCTCTGAC-3'  |
|               | Reverse 5'-CAGGATGAGAACAGGCTGGGAT-3'    |
| <i>Mcpt4</i>  | Forward 5'-GTAATTCCTCTGCCTCGTCCTTC-3'   |
|               | Reverse 5'-GTAATTCCTCTGCCTCGTCCTTC-3'   |
| <i>Mcpt6</i>  | Forward 5'-AGTAAGTGGCCCTGGCAGGTGAGCC-3' |
|               | Reverse 5'-GGTCCCCATAGTATAGATACTGCTC-3' |
| <i>Vegfa</i>  | Forward 5'-CACAGCAGATGTGAATGCAG-3'      |
|               | Reverse 5'-TTTACACGTCTGCGGATCTT-3'      |
| <i>Fgf2</i>   | Forward 5'-GAAACACTCTTCTGTAACACACTT-3'  |
|               | Reverse 5'-GTCAAACACTACAACCTCCAAGCAG-3' |
| <i>Il6</i>    | Forward 5'-CTCTGGGAAATCGTGGAAAT-3'      |
|               | Reverse 5'-CCAGTTTGGTAGCATCCATC-3'      |
| <i>Colla1</i> | Forward 5'-CCTGGTAAAGATGGTGCC-3'        |
|               | Reverse 5'-CACCAGGTTACCTTTTCGCACC-3'    |
| <i>Tgfb1</i>  | Forward 5'-CAACAATTCCTGGCGTTACCTTGG-3'  |
|               | Reverse 5'-GAAAGCCCTGTATTCCGTCTCCTT-3'  |
| <i>Smad2</i>  | Forward 5'-ATGTCGTCCATCTTGCCATTC-3'     |
|               | Reverse 5'-AACCGTCCTGTTTTCTTTAGCTT-3'   |
| <i>Acta2</i>  | Forward 5'-CTGACAGAGGCACCACTGAA-3'      |
|               | Reverse 5'-CATCTCCAGAGTCCAGCACA-3'      |
| <i>Fn1</i>    | Forward 5'-CGAGGTGACAGAGACCACAA-3'      |
|               | Reverse 5'-CTGGAGTCAAGCCAGACACA-3';     |
| <i>Smad2</i>  | Forward 5'-ATGTCGTCCATCTTGCCATTC-3'     |
|               | Reverse 5'-AACCGTCCTGTTTTCTTTAGCTT-3'   |
| <i>Smad7</i>  | Forward 5'-GGGCTTTCAGATTCCTCAACTT-3'    |
|               | Reverse 5'-CACGCGAGTCTTCTCCTCC-3'       |
| <i>Bmp7</i>   | Forward 5'-CAAGCAGCGCAGCCAGAATCG-3'     |
|               | Reverse 5'-CAATGATCCAGTCCTGCCAGCCAA-3'; |
| <i>Cdkn2a</i> | Forward 5'-CCCCAGTGTCTTACAGAGTG-3'      |
|               | Reverse 5'-GTGCCAGAGTGGATGTCT-3'        |

|               |                                              |
|---------------|----------------------------------------------|
| <i>Cdkn1a</i> | Forward 5'-TGGT- GTCATCCCTACCTTCA-3'         |
|               | Reverse 5'-TTCTCTCTATCCTC TCCCCAG-3'         |
| <i>Trp53</i>  | Forward 5'-TGTGTTACACACTAAGGGG-3'            |
|               | Reverse 5'-CCTTTGTTCTTGGCAGAAGACT-3'         |
| <i>Cdkn1c</i> | Forward 5'-CTCAAGCTTCAAGATGTGGACCGTGCCAGT-3' |
|               | Reverse 5'-GAGGAATTCGGGCGAGAACCTTCCAGAA-3'   |
| <i>Gadph</i>  | Forward 5'-AGCCACATCGCTCAGACAC-3'            |
|               | Reverse 5'-AGGCAGGTTTGATCTCCGTT-3'           |

### Supplementary Figure and Figure legends

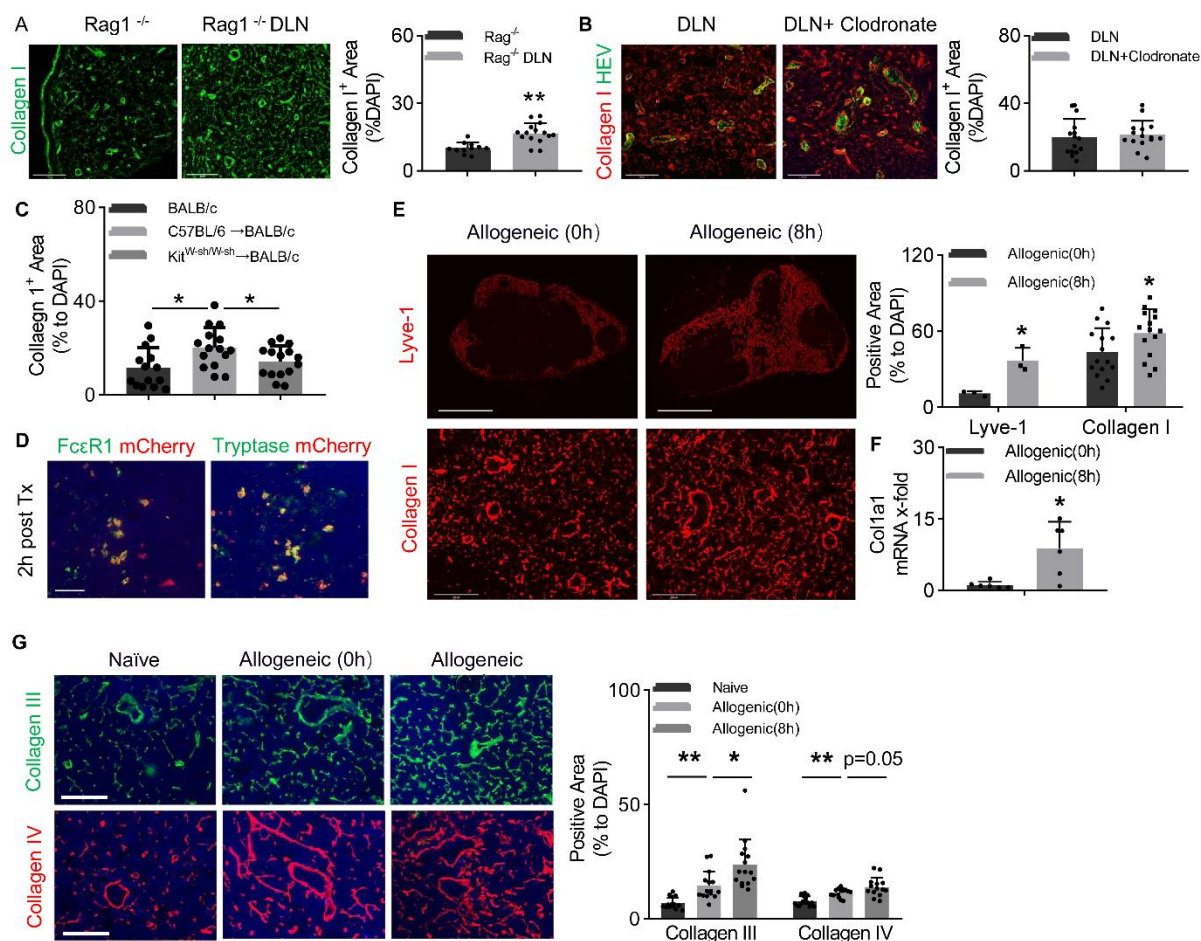

**Supplementary Figure 1: Ischemia activates mast cell-induced collagen 1 accumulation and lymphangiogenesis in DLNs following skin transplantation. (A) Comparison and semi-**

quantitative analysis of collagen I staining in DLNs from BALB/c → Rag1<sup>-/-</sup> skin transplant recipient mice in comparison to the axillary lymph nodes of Rag1<sup>-/-</sup> mice at day 1 after skin transplantation. Scale bar 100μm. (B) Comparison and analysis of collagen I staining and between DLNs of BALB/c→C57BL/6J skin transplant recipient mice with and without clodronate treatment. Scale bar 100μm. (C) Assessment of collagen 1<sup>+</sup> region in the DLNs of naïve BALB/c mice, and those that received skin allografts from C57BL/6J and Kit<sup>W-sh/W-sh</sup> mice (n=4). (D) Fluorescence micrographs of DLNs of BALB/c recipients of skin allografts from C57BL/6-Tg(UBC-mCherry) donor mice demonstrate presence of mast cells within 2 hours following transplantation, as demonstrated by co-staining of the mast cell markers FcεR1 (green, left) and tryptase (green, right) with mCherry (red). (E) IF staining of Lyve-1<sup>+</sup> lymphatic vessels and collagen 1<sup>+</sup> region and semi-quantitative assessment in the DLNs following transplantation of WT and ischemic organs (~8 hours cold ischemia time, scale bars 1000μm and 100μm, n=4). (F) Gene expression level of *Colla1* in the DLNs following transplantation of WT and ischemic organs (n=6). (G) Fluorescence micrographs and analysis of collagen III<sup>+</sup> and collagen IV<sup>+</sup> region in naïve LNs and DLNs following transplantation of WT and ischemic organs. Scale bars 50μm (n=3). Percentage of area stained positive in fluorescence micrographs was assessed in 3-6 random microscopic fields for each mouse. \**p* < 0.05; \*\**p* < 0.01 by Student's t test and 2-way ANOVA with Tukey's multiple-comparisons test.

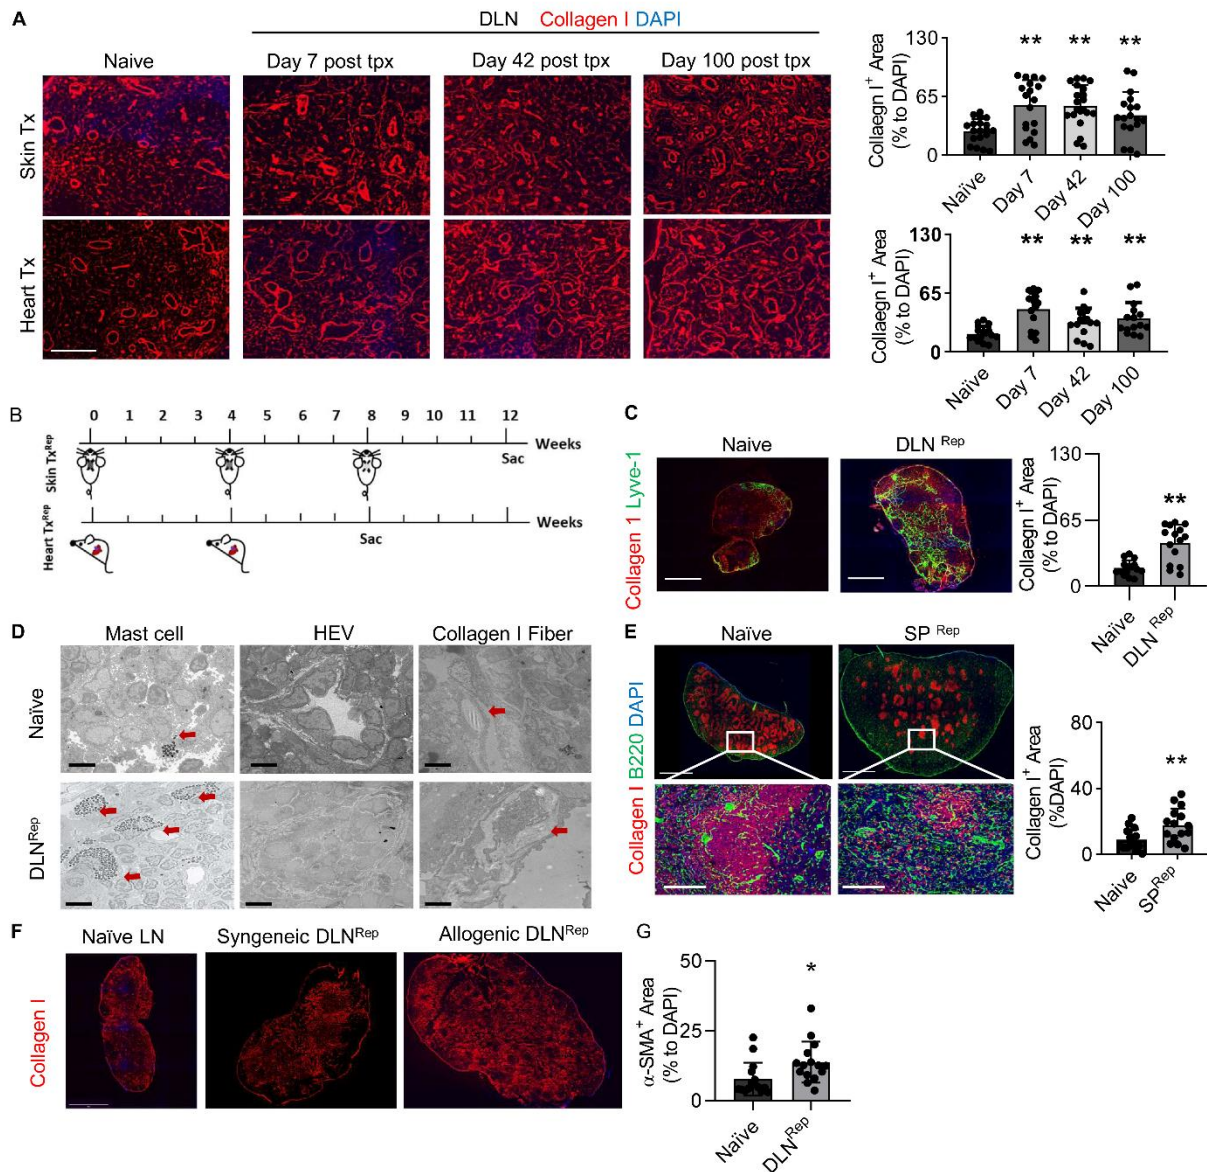

**Supplementary Figure 2: Persistent accumulation of collagen 1 in DLNs following transplantation.** (A) Fluorescence microscopic analysis shows marked increase of collagen 1 fibers (red) at 7, 42, and 100 days following skin and heart transplantation. Scale bar 100 $\mu$ m (n=3). (B) Schematic for the timelines of repetitive skin transplantation and heart transplantation models. (C) Fluorescence micrograph of collagen I<sup>+</sup> (red) and Lyve-1<sup>+</sup> (green) staining and semi-quantitative analysis of collagen 1<sup>+</sup> region in DLN<sup>Rep</sup> following repetitive BALB/c  $\rightarrow$  C57/BJ6 heart transplantation. Scale bar 1000 $\mu$ m (n=3). (D) Electron micrograph of one to two mast cells

located near lymphatics, HEVs, and collagen 1 fibers (red arrow) in naïve LN and higher number in DLN<sup>Rep</sup>, along with obliteration of HEV lumen, detachment of HEV, and higher collagen 1 fiber density. Scale bar 2 $\mu$ m in mast cell and HEV images, 8 $\mu$ m in collagen 1 fiber images. (E) Fluorescence micrographs of collagen I<sup>+</sup> fibers (red) and B220<sup>+</sup> B cells (green) in the spleens of mice that underwent repetitive transplantation. Scale bars 1000 $\mu$ m and 50  $\mu$ m (n=3). (F) Gene expression levels of collagen 1<sup>+</sup> (red) in LNs of naïve mice and DLN<sup>Rep</sup> of recipients of syngeneic and allogeneic skin transplantation. Scale bar 1500 $\mu$ m. (G) Assessment of  $\alpha$ -SMA<sup>+</sup> staining in naïve LNs and DLNs following repetitive skin transplantation. Scale bar 1000 $\mu$ m (n=4). Data in graphs are represented as means  $\pm$  SD. Percentage of area stained positive in fluorescence micrographs was assessed in 3-6 random microscopic fields for each mouse. \* $p < 0.05$ ; \*\* $p < 0.01$  by Student's t test and 2-way ANOVA with Tukey's multiple-comparisons test.

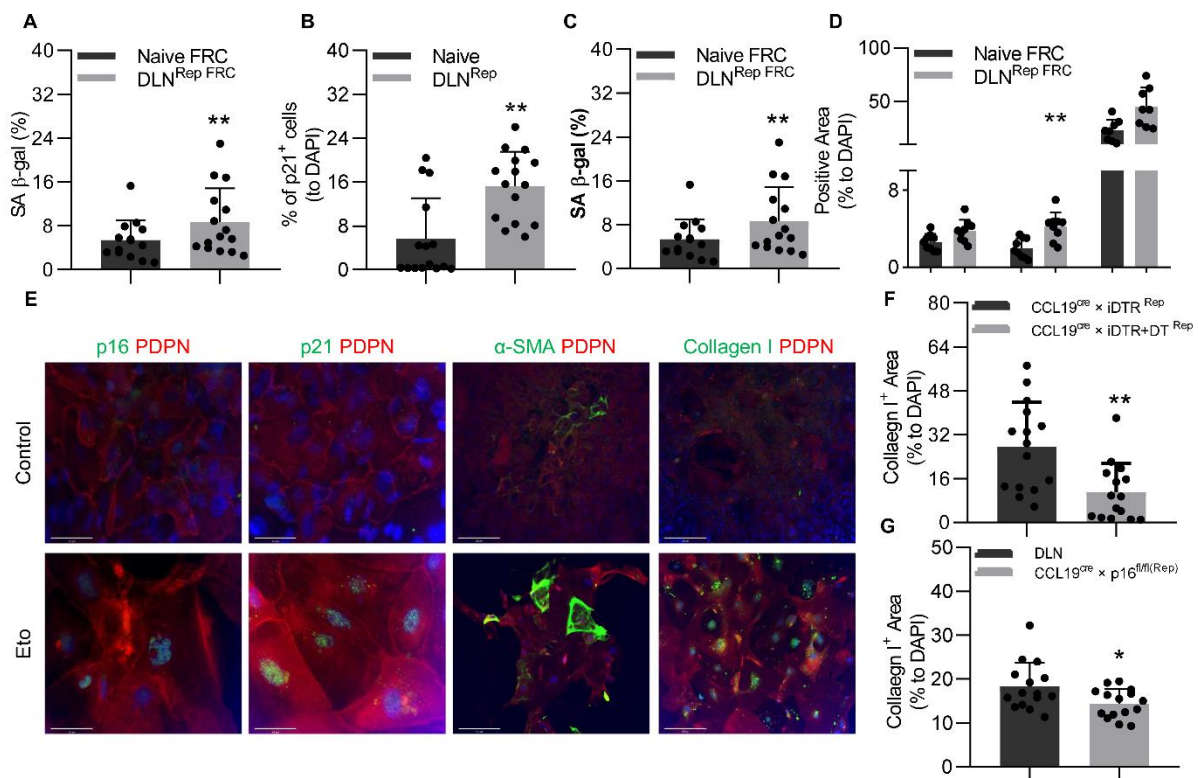

**Supplementary Figure 3: Senescent FRCs promote fibrosis.** Analysis of the percentage of (A)  $\beta$ -gal<sup>+</sup> cells and (B) p21<sup>+</sup> cells in naïve LNs and DLN<sup>Rep</sup> (n=4). Analysis of (C) surface area percentage occupied by  $\beta$ -gal<sup>+</sup> cells, and (D)  $\alpha$ -SMA<sup>+</sup>, collagen 1<sup>+</sup>, and p21<sup>+</sup> cells among FRCs isolated from naïve LNs and DLN<sup>REP</sup> (n=3). (E) IF staining shows that the expression levels of p16, p21, collagen 1, and  $\alpha$ -SMA by cultured FRCs increase after etoposide treatment. Evaluation of collagen 1<sup>+</sup> region in DLNs of (F) CCL19<sup>cre</sup>×iDTR and (G) CCL19<sup>cre</sup>×p16<sup>fl/fl</sup> allogeneic skin transplant recipients (n=4). Data in graphs are represented as means  $\pm$  SD. Percentage of area stained positive in fluorescence micrographs was assessed in 3-6 random microscopic fields for each mouse. \**p* < 0.05; \*\**p* < 0.01 by Student's t test.

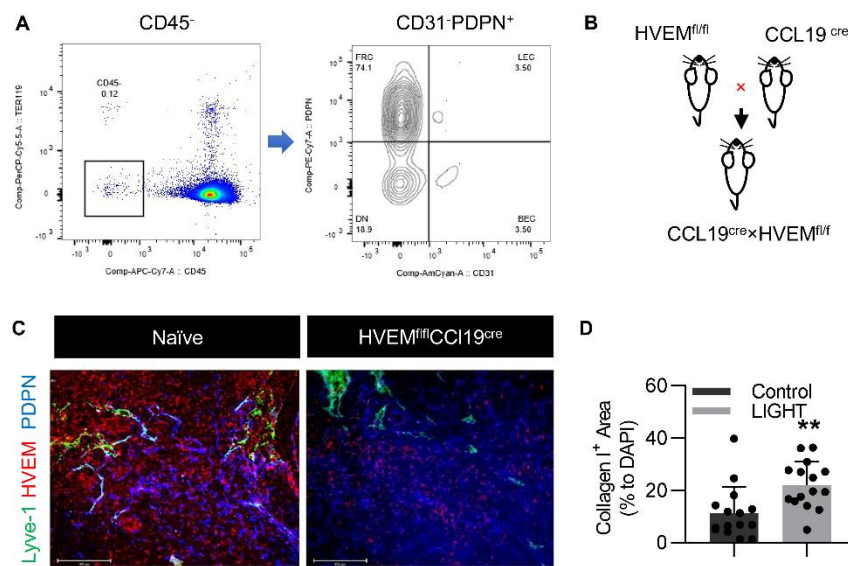

**Supplementary Figure 4: HVEM expression in FRCs of C57BL/6J and CCL19<sup>cre</sup>×HVEM<sup>fl/fl</sup> mice.** (A) Gating strategy for flow cytometric analysis of FRCs. (B) Schematic for generation of CCL19<sup>cre</sup> × HVEM<sup>fl/fl</sup> mice. (C) IF staining shows HVEM (red) expression by PDPN (blue)<sup>+</sup> LYVE-1(green)<sup>-</sup> FRCs. (D) Semi-quantitative analysis of collagen I<sup>+</sup> fibers in naïve (control) and LIGHT-treated FRCs (n=4). Data in graphs are represented as means  $\pm$  SD. \**p* < 0.05; \*\**p* < 0.01 by Student's t test.

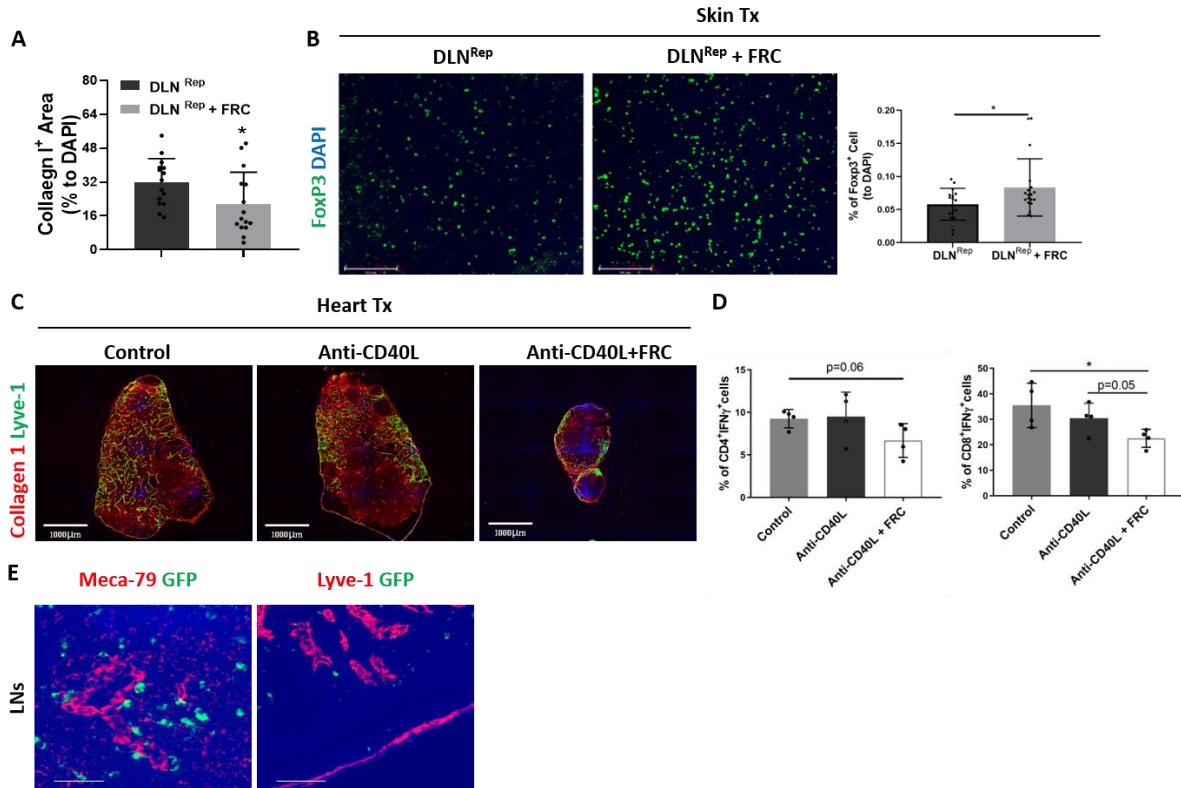

**Supplementary Figure 5: FRC treatment improves immunosuppression post-transplantation.** (A) Assessment of collagen I<sup>+</sup> staining in the DLNs of untreated mice (DLN<sup>Rep</sup>) and mice treated with FRCs (DLN<sup>Rep</sup> + FRC) (n=4). (B) IF staining of Foxp3<sup>+</sup> Tregs in DLN<sup>Rep</sup> from mice treated with and without FRCs. (C) Co-staining of LYVE-1 (green) and collagen 1 (red) in DLNs at 7 days after heart transplantation. Scale bar 1000 $\mu$ m. (D) Percentages of CD4<sup>+</sup>IFN- $\gamma$ <sup>+</sup> cells and CD8<sup>+</sup>IFN $\gamma$ <sup>+</sup> cells in splenocytes as measured by flow cytometry (each dot represents one biological replicate). (E) Fluorescence micrographs of DLNs of C57BL/6J mice harvested 24 hours following injection of CMFDA-FRCs. GFP signal was detected along with Meca-79<sup>+</sup> HEVs (Red) and Lyve-1<sup>+</sup> lymphatic vessels (Red). Data in graphs are represented as means  $\pm$  SD. Percentage of area stained positive in fluorescence micrographs was assessed in 3-6 random microscopic fields for each mouse. \**p* < 0.05; \*\**p* < 0.01 by Student's t test and 2-way ANOVA with Tukey's multiple-comparisons test.
